# Supplementary material for: Compatibility of Drotaverine Hydrochloride with Ibuprofen and Ketoprofen Nonsteroidal Anti-Inflammatory Drugs Mixtures
Source: MDPI journal article supplement (doi:10.3390/ma15031244), 2022-02-08
Supplement: s1 [file s1]

# Compatibility of Drotaverine Hydrochloride with Ibuprofen and Ketoprofen Nonsteroidal Anti-inflammatory Drugs Mixtures

Andreia-Cristina Soare, Viorica Meltzer, Claudiu Colbea, Ioana Stanculescu and Elena Pincu \*

Department of Physical Chemistry, Faculty of Chemistry, University of Bucharest, Bd. Regina Elisabeta 4-12, 030018 Bucharest, Romania; andreia-cristina.soare@drd.unibuc.ro (A.-C.S.); meltzerviorica@yahoo.com (V.M.); ccolbea@ethz.ch (C.C.); ioana.stanculescu@chimie.unibuc.ro (I.S.)

\* Correspondence: elena.pincu@chimie.unibuc.ro

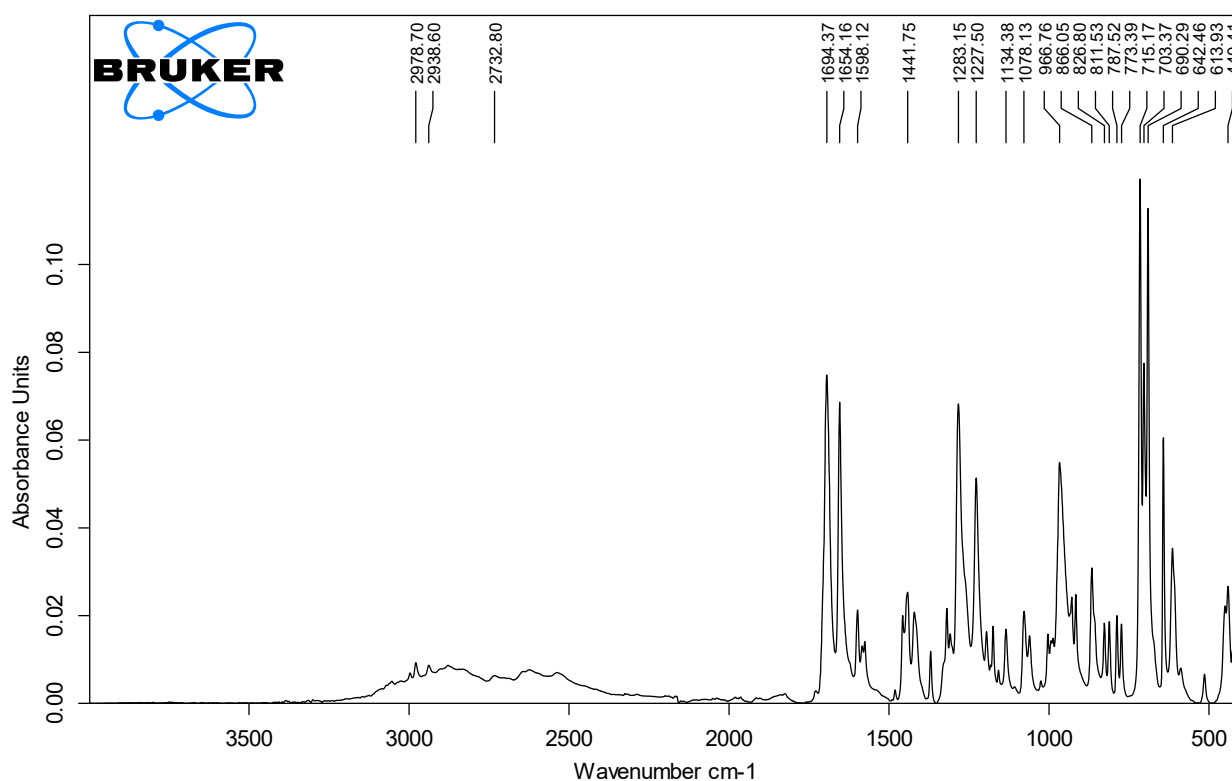

Figure S1. FTIR spectra of ketoprofen.

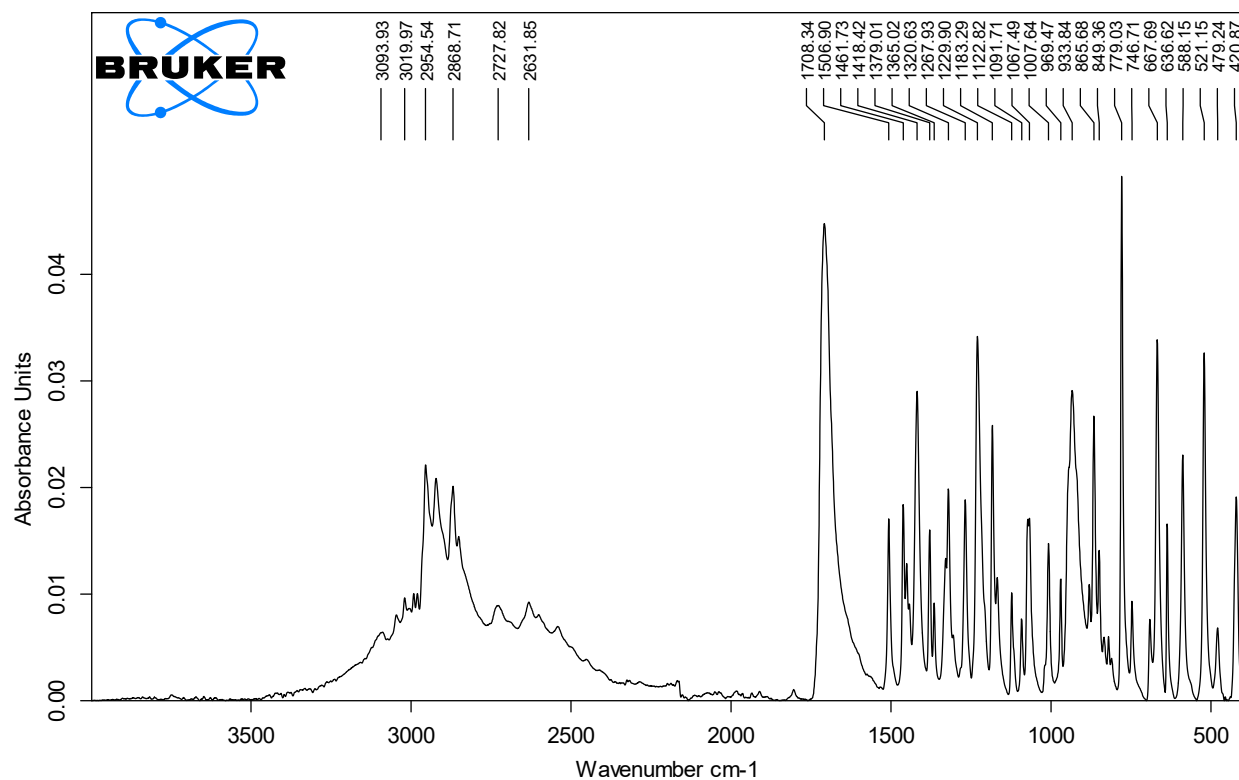

**Figure S2.** FTIR spectra of ibuprofen.

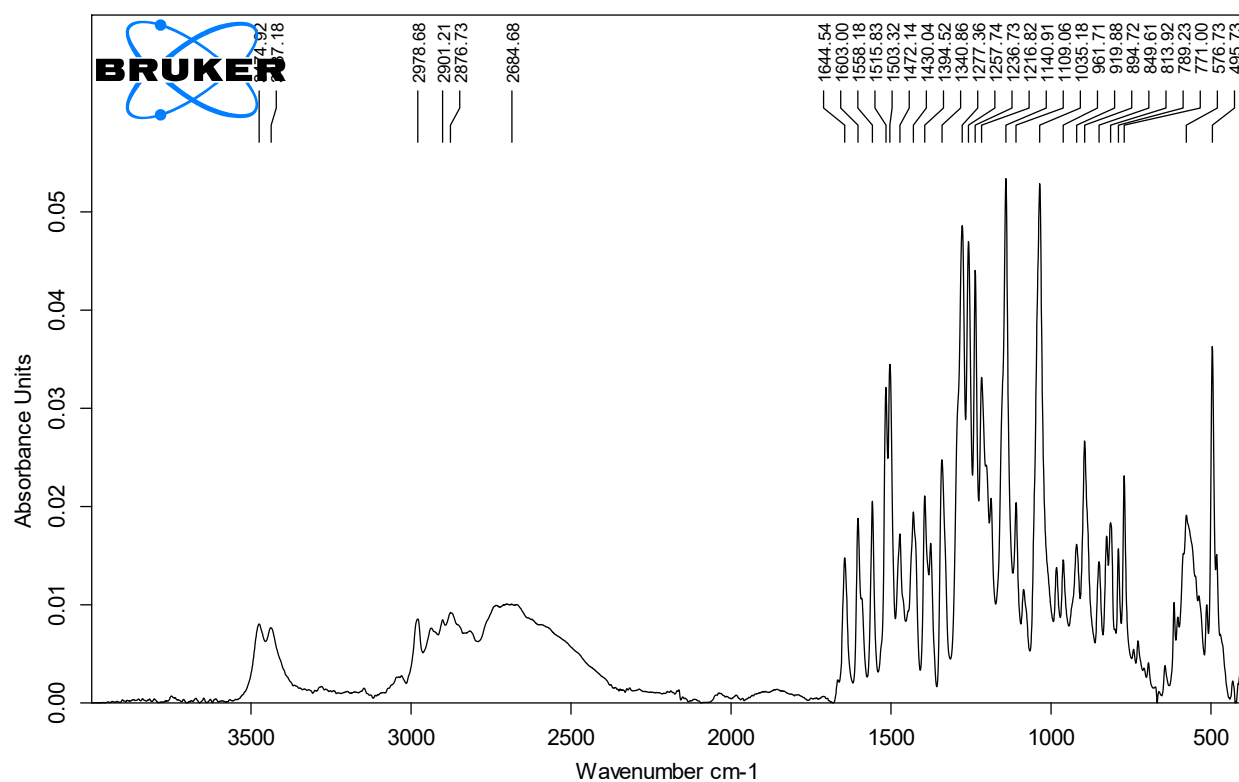

**Figure S3.** FTIR spectra of drotaverine hydrochloride.

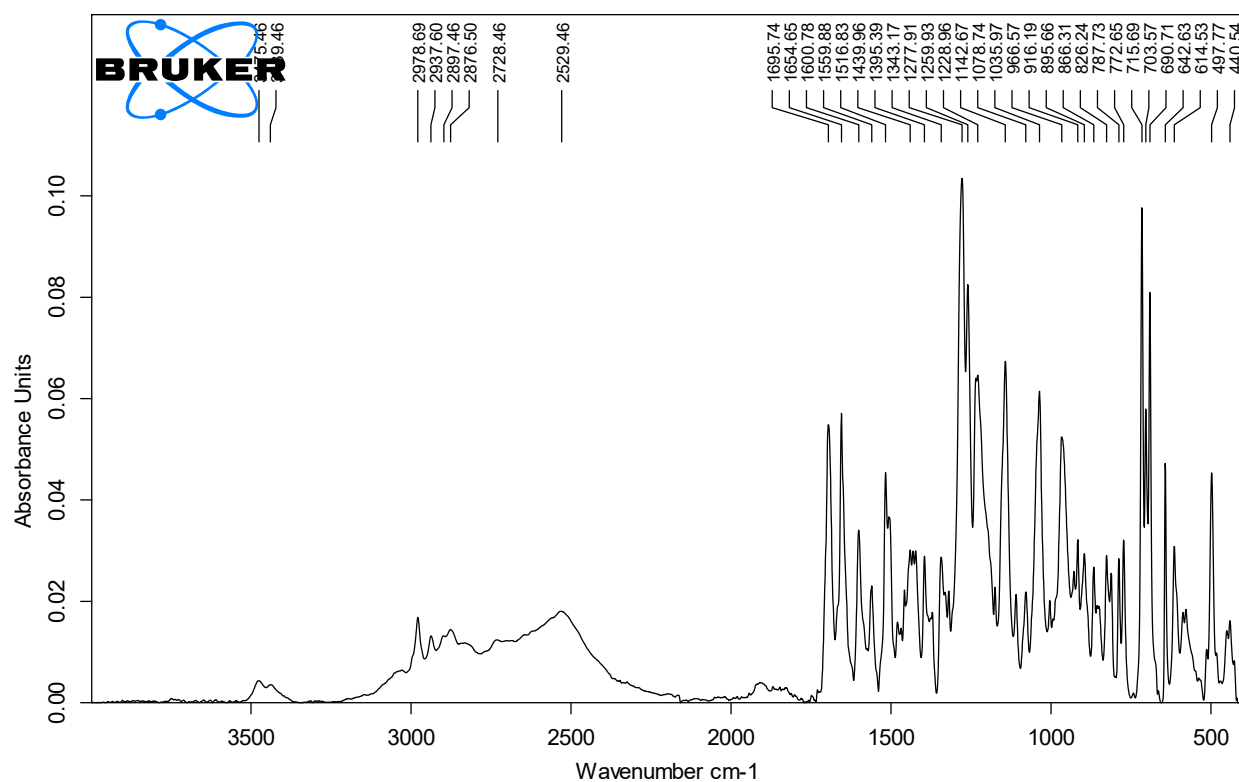

**Figure S4.** FTIR spectra of ketoprofen-drotaverine hydrochloride.

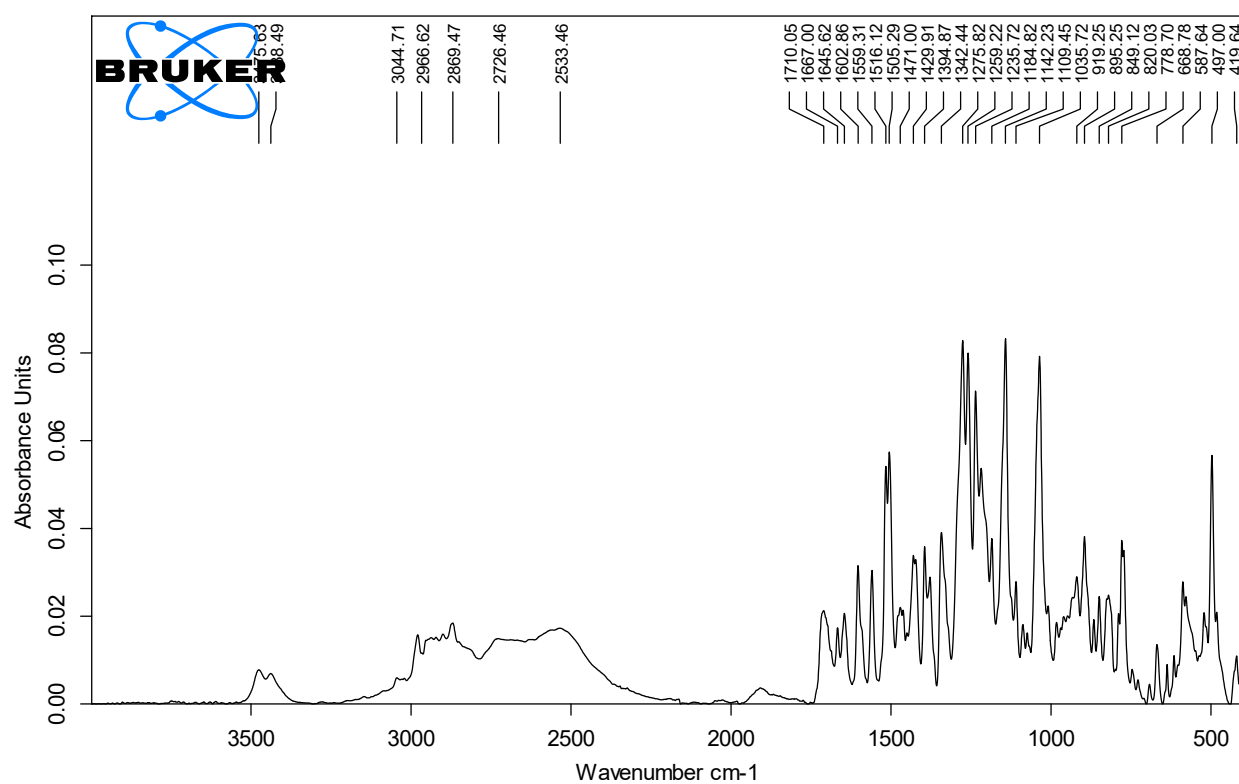

**Figure S5.** FTIR spectra of ibuprofen-drotaverine hydrochloride.
